# Supplementary material
Source: publisher figshare collection journal article supplement (https://karger.figshare.com/ndownloader/files/14107655)
Supplement: Supplementary file 1 [file 14107655]

Appendix

| MEDLINE |
| --- |
| 1. “dry eye”[tiab] OR “Keratoconjunctivitis Sicca”[tiab] OR “Keratoconjunctival Sicca”[tiab] OR “Sicca Syndrome”[tiab] OR “Sjogrens”[tiab] OR “Sjogren's”[tiab] OR “Sjogren”[tiab] OR “Sicca Syndromes”[tiab] OR “dry eyes”[tiab] 18413  2. (("Dry Eye Syndromes"[Mesh:NoExp]) OR "Keratoconjunctivitis Sicca"[Mesh]) OR "Sjogren's Syndrome"[Mesh] 14329  3. 1 OR 2 20804  4. diquafosol[tiab] OR “P2Y2 Receptor Agonists”[tiab] OR “P2Y2 Receptor Agonist”[tiab] OR “P2Y2 Agonists”[tiab] OR “P2Y2 Agonist”[tiab] 105  5. ("Purinergic P2Y Receptor Agonists"[Mesh]) OR "diquafosol" [Supplementary Concept] 146  6. 4 OR 5 215  7. 3 AND 6 58 |
| EMBASE |
| 1. 'dry eye':ab,ti OR ‘Keratoconjunctivitis Sicca':ab,ti OR ‘Keratoconjunctival Sicca':ab,ti OR ‘Sicca Syndrome':ab,ti OR ‘Sjogrens':ab,ti OR ‘Sjogren's':ab,ti OR ‘Sjogren':ab,ti OR ‘Sicca Syndromes':ab,ti OR ‘dry eyes':ab,ti 23092  2. 'dry eye'/exp OR 'keratoconjunctivitis sicca'/exp OR 'Sjoegren syndrome'/exp  3. 1 OR 2 31934  4. diquafosol:ab,ti OR ‘P2Y2 Receptor Agonists':ab,ti OR ’P2Y2 Receptor Agonist':ab,ti OR ‘P2Y2 Agonists':ab,ti OR ‘P2Y2 Agonist’:ab,ti 91  5. 'purinergic P2Y receptor agonist'/exp OR 'diquafosol'/exp 233  6. 4 OR 5 271  7. 3 AND 6 126  8. 7 NOT ('animal experiment'/de OR 'animal model'/de OR 'animal tissue'/de OR 'nonhuman'/de) 82 |
| COCHRAN |
| 1. “dry eye” or “Keratoconjunctivitis Sicca” or “Keratoconjunctival Sicca” or “Sicca Syndrome” or “Sjogrens” or “Sjogren's” or “Sjogren” or “Sicca Syndromes” or “dry eyes”:ti,ab,kw 1574  2. MeSH descriptor: [Dry Eye Syndromes] this term only 281  3. MeSH descriptor: [Keratoconjunctivitis Sicca] explode all trees 53  4. MeSH descriptor: [Sjogren's Syndrome] explode all trees 144  5. 2-4/OR 457  6. 1 OR 5 1574  7. diquafosol or "P2Y2 Receptor Agonists" or "P2Y2 Receptor Agonist" or "P2Y2 Agonists" or "P2Y2 Agonist":ti,ab,kw 30  8. MeSH descriptor: [Purinergic P2Y Receptor Agonists] explode all trees 3  9. 7 OR 8 30  10. 6 AND 9 21  11. 10/TRIALS 21 |
| WOS |
| 1. TOPIC: (“dry eye” OR “Keratoconjunctivitis Sicca” OR “Keratoconjunctival Sicca” OR “Sicca Syndrome” OR “Sjogrens” OR “Sjogren's” OR “Sjogren” OR “Sicca Syndromes” OR “dry eyes”) OR TITLE: (“dry eye” OR “Keratoconjunctivitis Sicca” OR “Keratoconjunctival Sicca” OR “Sicca Syndrome” OR “Sjogrens” OR “Sjogren's” OR “Sjogren” OR “Sicca Syndromes” OR “dry eyes”) 22271  2. TOPIC: (diquafosol OR “P2Y2 Receptor Agonists” OR “P2Y2 Receptor Agonist” OR “P2Y2 Agonists” OR “P2Y2 Agonist”) OR TITLE: (diquafosol OR “P2Y2 Receptor Agonists” OR “P2Y2 Receptor Agonist” OR “P2Y2 Agonists” OR “P2Y2 Agonist”) 85  3. 1 AND 2 85 |
| SCOPUS |
| 1. TITLE-ABS-KEY ( "dry eye" OR "Keratoconjunctivitis Sicca" OR "Keratoconjunctival Sicca" OR "Sicca Syndrome" OR "Sjogrens" OR "Sjogren's" OR "Sjogren" OR "Sicca Syndromes" OR "dry eyes" ) 27873  2. ( INDEXTERMS ( "Dry Eye Syndromes" ) ) OR ( INDEXTERMS ( "Keratoconjunctivitis Sicca" ) ) OR ( INDEXTERMS ( "Sjogren's Syndrome" ) ) 14759  3. 1 OR 2 27873  4. TITLE-ABS-KEY ( diquafosol OR "P2Y2 Receptor Agonists" OR "P2Y2 Receptor Agonist" OR "P2Y2 Agonists" OR "P2Y2 Agonist" ) 264  5. ( INDEXTERMS ( "Purinergic P2Y Receptor Agonists" ) ) OR ( INDEXTERMS ( "diquafosol" ) ) 288  6. 4 OR 5 386  7. 3 AND 6 139 |
